# Supplementary material for: Logical Observation Identifiers Names and Codes (LOINC®) Applied to Microbiology: A National Laboratory Mapping Experience in Taiwan
Source: MDPI journal article supplement (doi:10.3390/diagnostics11091564), 2021-08-28
Supplement: s1 [file s1]

**Supplementary Table S1:** Description of LOINC six axes.

| <b>Axis</b>       | <b>Meaning</b>                                 |
|-------------------|------------------------------------------------|
| Component         | What is being measured                         |
| Property          | The characteristic of how it is being measured |
| Timing            | When the measurement is being completed        |
| System            | Where the analyte originates                   |
| Scale             | Which way will the test result be expressed    |
| Method (optional) | What method was used to make this measurement  |

**Supplementary Table S2:** Inceptive provided by government

| <b>Year</b> | <b>Participant</b>    | <b>Financial support</b>            |
|-------------|-----------------------|-------------------------------------|
| <b>2014</b> | medical centers: 15   | NT\$ 0.6~0.8 million per hospital   |
|             | Regional hospital: 5  |                                     |
| <b>2015</b> | medical centers: 2    | NT\$ 0.6~0.75 million per hospital  |
|             | Regional hospital: 7  |                                     |
| <b>2016</b> | medical centers: 2    | NT\$ 0.48~0.58 million per hospital |
|             | Regional hospital: 22 |                                     |
